# Supplementary material
Source: publisher site journal article supplement (https://www.dovepress.com/article/451930)
Supplement: Supplementary file 1 [file get_supplementary_file.php]

## Supplement 1: Search strategies

### PubMed:

((("labour"[All Fields] OR "work"[MeSH Terms] OR "work"[All Fields] OR "labor"[All Fields] OR "labor, obstetric"[MeSH Terms] OR ("labor"[All Fields] AND "obstetric"[All Fields]) OR "obstetric labor"[All Fields]) AND ("S-ketamine"[MeSH Terms] OR "S-ketamine"[All Fields] OR ("esketamine"[All Fields])) AND ("depressive disorder"[MeSH Terms] OR ("depressive"[All Fields] AND "disorder"[All Fields]) OR "depressive disorder"[All Fields] OR "depression"[All Fields] OR "depression"[MeSH Terms]) AND ((clinical trial) OR (clinical study)))

### Web of science:

(TS=(esketamine) OR TS=(S-ketamine)) AND TS=(depression) AND (TS=(postpartum) OR TS=(postnatal))

## Supplement 2A. Risk of bias summary.

| Wang 2023 | Shen 2023 | Liu 2023 | Han 2022 | Guo 2023 |                                                           |
|-----------|-----------|----------|----------|----------|-----------------------------------------------------------|
|           |           |          |          |          | Random sequence generation (selection bias)               |
|           |           |          |          |          | Allocation concealment (selection bias)                   |
|           |           |          |          |          | Blinding of participants and personnel (performance bias) |
|           |           |          |          |          | Blinding of outcome assessment (detection bias)           |
|           |           |          |          |          | Incomplete outcome data (attrition bias)                  |
|           |           |          |          |          | Selective reporting (reporting bias)                      |
|           |           |          |          |          | Other bias                                                |

## Supplement 2B. Sensitivity analysis for the early stage.

| Study omitted   | Estimate          | [95% Conf. Interval]          |
|-----------------|-------------------|-------------------------------|
| Wang (2023)     | -2.73723221       | -1.4468604 -0.02760406        |
| Liu (2023)      | -2.3704414        | -4.3615227 -0.37936005        |
| Shen (2023)     | -2.6560647        | -4.7958856 -0.51624382        |
| Guo (2023)      | -2.4832439        | -5.1760855 0.20959745         |
| Han (2022)      | -2.2448773        | -4.755724 0.26596937          |
| <b>Combined</b> | <b>-2.0530829</b> | <b>-3.7693364 -0.33682938</b> |

## Supplement 2C. Sensitivity analysis for the middle and the later stages.

| Study omitted   | Estimate          | [95% Conf. Interval] |                  |
|-----------------|-------------------|----------------------|------------------|
| Wang (2023)     | -.14721325        | -.49465942           | .20023292        |
| Liu (2023)      | -1.6674263        | -3.3697267           | .03487388        |
| Shen (2023)     | -1.9683123        | -3.8467221           | -.08990239       |
| Guo (2023)      | -1.9889039        | -4.2691817           | .29137409        |
| Han (2022)      | -1.8795015        | -4.0490589           | .29005593        |
| <b>Combined</b> | <b>-1.4114868</b> | <b>-2.858624</b>     | <b>.03565033</b> |

**Supplement 2D.** Egger linear regression test for publication bias. Analyzed from the early stage and the middle and later stages, respectively.

**Egger's test**

| Std_Eff | Coef.     | Std. Err. | t     | P> t  | [95% Conf. Interval] |          |
|---------|-----------|-----------|-------|-------|----------------------|----------|
| slope   | .6051343  | 1.695134  | 0.36  | 0.745 | -4.789539            | 5.999808 |
| bias    | -5.025853 | 4.529928  | -1.11 | 0.348 | -19.44211            | 9.390399 |

  

| Std_Eff | Coef.     | Std. Err. | t     | P> t  | [95% Conf. Interval] |          |
|---------|-----------|-----------|-------|-------|----------------------|----------|
| slope   | 1.53005   | 1.203371  | 1.27  | 0.293 | -2.299614            | 5.359713 |
| bias    | -5.341989 | 3.07421   | -1.74 | 0.181 | -15.1255             | 4.44152  |
